# Supplementary material for: CH3NO as a potential intermediate for early atmospheric HCN: a quantum chemical insight
Source: Royal Society of Chemistry journal article supplement (doi:10.1039/c9cp03874d), 2019-01-01
Supplement: c9cp03874d1.pdf [file c9cp03874d1.pdf]

## **Supporting Information**

# **CH<sub>3</sub>NO as a Potential Intermediate for Early Atmospheric HCN: A Quantum Chemical Insight**

Sourav Ghoshal, Anup Pramanik, Santu Biswas,  
and Pranab Sarkar\*

Department of Chemistry, Visva-Bharati University, Santiniketan-  
731235, India

E-mail: [pranab.sarkar@visva-bharati.ac.in](mailto:pranab.sarkar@visva-bharati.ac.in)

### **Table of Contents:**

1. Methodology for CBS extrapolation.
2. Table S1-S3: Tables of electronic energies.
3. Table S4-S11: Tables of rate constants.
4. Figures S1-S3.
5. Cartesian coordinates of optimized geometries.
6. References.

## **Supporting Note 1:**

**Methodology for CBS Extrapolation:** We have used the method proposed by Varandas and Pansini for CBS extrapolation.<sup>1</sup> For this, single point energy calculations have been carried out at CCSD(T) level of theory using aug-cc-pVDZ ( $\equiv$  DZ), aug-cc-pVTZ ( $\equiv$  TZ) basis sets and with HF/aug-cc-pVQZ ( $\equiv$  HF/QZ) level of theory. In this method, energy extrapolation to CBS limit is done by separately extrapolating the correlation energy (Corr) and Hartree-Fock energy (HF) as shown below:

$$\text{CBS(Corr)} = \frac{x_1^3 E_{x+1} - x_2^3 E_x}{x_1^3 - x_2^3} \quad (1)$$

In Equation-1,  $E_X$  is the correlation energy at CCSD(T) level of theory employing a basis set whose cardinality is  $X$ , i.e.,  $X = 2$  for DZ basis and  $X = 3$  for TZ basis. To extrapolate correlation energy, we have used DZ and TZ basis. Recommended values for  $x_1$  and  $x_2$  at DZ basis are 2.71 and 1.91 respectively.<sup>1</sup> Similarly, extrapolation of Hartree-Fock energy follows the following equation:

$$\text{CBS(HF)} = \frac{x_1^5 E_{x+1} - x_2^5 E_x}{x_1^5 - x_2^5} \quad (2)$$

In Equation-2, recommended values for  $x_1$  and  $x_2$  at TZ basis are 4 and 3 respectively. In the present study, HF energies of all molecular species were extrapolated by using energies obtained at TZ and QZ basis sets, on the other hand, correlation energies of all molecular species were extrapolated by using energies obtained at DZ and TZ basis sets. Potential energy diagram (see Figure 1) have been drawn on the basis of CCSD(T)/CBS//MP2/aug-cc-pVTZ level of calculation. That means single point CCSD(T) calculations have been carried out by using MP2/aug-cc-pVTZ level optimized geometries and ZPE corrections are taken from MP2/aug-cc-pVTZ level of calculations. The similar method has recently been employed successfully by Sarkar et al.<sup>2-4</sup> Total electronic energies of various species could be found in Table S2.

**Table S1.** Calculated zero point vibrational energy (zpe) corrected electronic energies ( $E_{zpe}$ ), zero point vibrational energies, total electronic energies without zpe correction (E) of various molecules, complexes, intermediates and transitions States at the M06-2X level in conjunction with 6-311++G(3df,3pd) basis set as well as at the CCSD(T)/6-311++G(3df,3pd) level of theory.

| Molecules/Complexes/<br>Intermediates/<br>Transitions States | M06-2X/<br>6-311++G(3df,3pd) | M06-2X/<br>6-311++G(3df,3pd) | CCSD(T)/<br>6-311++G(3df,3pd) |
|--------------------------------------------------------------|------------------------------|------------------------------|-------------------------------|
|                                                              | $E_{zpe}$                    | zpe                          | E                             |
| CH <sub>3</sub> NO                                           | -169.740352                  | 0.043781                     | -169.5458242                  |
| (CH <sub>2</sub> NOH)-I                                      | -169.754162                  | 0.044818                     | -169.5580378                  |
| (CH <sub>2</sub> NOH)-II                                     | -169.761269                  | 0.045249                     | -169.5660905                  |
| HCN                                                          | -93.404403                   | 0.016589                     | -93.2752787                   |
| CH <sub>3</sub> N(OH) <sub>2</sub>                           | -246.129539                  | 0.073533                     | -245.8677976                  |
| H <sub>2</sub> O                                             | -76.405308                   | 0.021732                     | -76.3374378                   |
| NH <sub>3</sub>                                              | -56.516498                   | 0.034474                     | -56.4766835                   |
| HCl                                                          | -460.794798                  | 0.006857                     | -460.3306738                  |
| HCOOH                                                        | -189.729164                  | 0.034447                     | -189.5061268                  |
| HNO <sub>3</sub>                                             | -280.859627                  | 0.027611                     | -280.5236721                  |
| H <sub>2</sub> SO <sub>4</sub>                               | -700.248532                  | 0.040294                     | -699.4493013                  |
| CH <sub>3</sub> NO...CH <sub>3</sub> NO                      | -339.484427                  | 0.089577                     | -339.0969075                  |
| CH <sub>3</sub> NO...H <sub>2</sub> O                        | -246.150710                  | 0.068093                     | -245.8906795                  |
| CH <sub>3</sub> NO...NH <sub>3</sub>                         | -226.260515                  | 0.080424                     | -226.0276478                  |
| CH <sub>3</sub> NO...HCl                                     | -630.539479                  | 0.052902                     | -629.8832355                  |
| CH <sub>3</sub> NO...HCOOH                                   | -359.478644                  | 0.080345                     | -359.0626254                  |
| CH <sub>3</sub> NO...HNO <sub>3</sub>                        | -450.610561                  | 0.073517                     | -450.081448                   |
| CH <sub>3</sub> NO...H <sub>2</sub> SO <sub>4</sub>          | -870.002118                  | 0.086301                     | -869.0107673                  |
| HCN...H <sub>2</sub> O                                       | -169.816264                  | 0.040315                     | -169.6213481                  |
| HCN...CH <sub>3</sub> N(OH) <sub>2</sub>                     | -339.544071                  | 0.091432                     | -339.1531996                  |
| HCN...CH <sub>3</sub> NO...H <sub>2</sub> O                  | -339.563344                  | 0.086277                     | -339.1745839                  |
| (CH <sub>2</sub> NOH...H <sub>2</sub> O)-I                   | -246.167255                  | 0.069511                     | -245.9061365                  |
| (CH <sub>2</sub> NOH...H <sub>2</sub> O)-II                  | -246.171701                  | 0.069821                     | -245.9114833                  |
| HCN...H <sub>2</sub> O...H <sub>2</sub> O                    | -246.232061                  | 0.065714                     | -245.9712746                  |
| (CH <sub>2</sub> NOH...NH <sub>3</sub> )-I                   | -226.280523                  | 0.082189                     | -226.0473938                  |
| (CH <sub>2</sub> NOH...NH <sub>3</sub> )-II                  | -226.281084                  | 0.081997                     | -226.0487893                  |
| HCN...NH <sub>3</sub> ...H <sub>2</sub> O                    | -226.33537                   | 0.077845                     | -226.1043033                  |
| (CH <sub>2</sub> NOH...HCl)-I                                | -630.554066                  | 0.053861                     | -629.896596                   |
| (CH <sub>2</sub> NOH...HCl)-II                               | -630.562414                  | 0.053955                     | -629.9051793                  |
| HCN...HCl...H <sub>2</sub> O                                 | -630.620020                  | 0.049994                     | -629.962238                   |
| (CH <sub>2</sub> NOH...HCOOH)-I                              | -359.498500                  | 0.082241                     | -359.0817471                  |
| (CH <sub>2</sub> NOH...HCOOH)-II                             | -359.500976                  | 0.081535                     | -359.0854534                  |
| HCN...HCOOH...H <sub>2</sub> O                               | -359.558909                  | 0.077893                     | -359.1422755                  |
| (CH <sub>2</sub> NOH...HNO <sub>3</sub> )-I                  | -450.628872                  | 0.074809                     | -450.098462                   |
| (CH <sub>2</sub> NOH...HNO <sub>3</sub> )-II                 | -450.633190                  | 0.074473                     | -450.1040995                  |
| HCN...HNO <sub>3</sub> ...H <sub>2</sub> O                   | -450.694985                  | 0.071175                     | -450.1637793                  |
| (CH <sub>2</sub> NOH...H <sub>2</sub> SO <sub>4</sub> )-I    | -870.019298                  | 0.087200                     | -869.0253297                  |
| (CH <sub>2</sub> NOH...H <sub>2</sub> SO <sub>4</sub> )-II   | -870.024704                  | 0.087289                     | -869.0337387                  |
| HCN...H <sub>2</sub> SO <sub>4</sub> ...H <sub>2</sub> O     | -870.090298                  | 0.083209                     | -869.0955588                  |
| (INT)-I                                                      | -339.491065                  | 0.093739                     | -339.1010638                  |
| (INT)-II                                                     | -339.495504                  | 0.094186                     | -339.1065761                  |
| TS-1                                                         | -169.645762                  | 0.038355                     | -169.446604                   |
| TS-2                                                         | -169.749088                  | 0.043957                     | -169.5527627                  |
| TS-3                                                         | -169.666266                  | 0.037441                     | -169.4672161                  |

|       |             |          |              |
|-------|-------------|----------|--------------|
| TS-4  | -339.429149 | 0.086941 | -339.0376247 |
| TS-5  | -339.486688 | 0.092958 | -339.0966273 |
| TS-6  | -339.414894 | 0.086237 | -339.0420736 |
| TS-7  | -339.481284 | 0.085589 | -339.088887  |
| TS-8  | -246.098087 | 0.064875 | -245.8280954 |
| TS-9  | -246.161387 | 0.068868 | -245.9000344 |
| TS-10 | -246.103709 | 0.062094 | -245.8347973 |
| TS-11 | -226.221171 | 0.078341 | -225.9816623 |
| TS-12 | -226.270197 | 0.080648 | -226.0362718 |
| TS-13 | -226.211714 | 0.076490 | -225.9751494 |
| TS-14 | -630.497003 | 0.051682 | -629.8329928 |
| TS-15 | -630.550203 | 0.052917 | -629.892372  |
| TS-16 | -630.509290 | 0.050176 | -629.8484644 |
| TS-17 | -359.448437 | 0.074861 | -359.021406  |
| TS-18 | -359.491616 | 0.080469 | -359.0745194 |
| TS-19 | -359.446559 | 0.073444 | -359.0216143 |
| TS-20 | -450.574458 | 0.067860 | -450.03383   |
| TS-21 | -450.624311 | 0.073408 | -450.0932029 |
| TS-22 | -450.578826 | 0.066411 | -450.0411191 |
| TS-23 | -869.971973 | 0.081089 | -868.9705058 |
| TS-24 | -870.016852 | 0.086390 | -869.0236269 |
| TS-25 | -869.974588 | 0.078997 | -868.976314  |

**Table S2.** Calculated electronic energies by using CCSD(T) and HF methods in conjunction with aug-cc-pVDZ ( $\equiv$  DZ), aug-cc-pVTZ ( $\equiv$  TZ) and aug-cc-pVQZ ( $\equiv$  QZ) basis sets. Single point CCSD(T) calculations have been carried out by using MP2/aug-cc-pVTZ level optimized geometries. MP2/aug-cc-pVTZ level calculated zero point vibrational energies (zpe) of various species have also been tabulated in the last column.

| Species                       | DZ              |                      | TZ              |                      | QZ              | CCSD(T)/    | MP2      |
|-------------------------------|-----------------|----------------------|-----------------|----------------------|-----------------|-------------|----------|
|                               | $E_{\text{HF}}$ | $E_{\text{CCSD(T)}}$ | $E_{\text{HF}}$ | $E_{\text{CCSD(T)}}$ | $E_{\text{HF}}$ | CBS         | ZPE      |
| CH <sub>3</sub> NO            | -168.855438     | -169.413779          | -168.893845     | -169.557747          | -168.904449     | -169.628515 | 0.043495 |
| TS-1                          | -168.725698     | -169.314391          | -168.763194     | -169.458631          | -168.773519     | -169.529671 | 0.038210 |
| (CH <sub>2</sub> NOH)-I       | -168.864413     | -169.423825          | -168.903948     | -169.569709          | -168.914609     | -169.640976 | 0.044034 |
| TS-2                          | -168.860390     | -169.419135          | -168.899709     | -169.564652          | -168.910225     | -169.635648 | 0.043150 |
| (CH <sub>2</sub> NOH)-II      | -168.873568     | -169.432021          | -168.912850     | -169.577668          | -168.923468     | -169.648889 | 0.044497 |
| TS-3                          | -168.750787     | -169.336650          | -168.788402     | -169.480336          | -168.798550     | -169.550781 | 0.036334 |
| HCN $\cdots$ H <sub>2</sub> O | -168.934632     | -169.487277          | -168.974442     | -169.632117          | -168.985071     | -169.702633 | 0.038984 |
| HCN                           | -92.885650      | -93.204347           | -92.906678      | -93.281062           | -92.912064      | -93.318124  | 0.015774 |
| H <sub>2</sub> O              | -76.041141      | -76.273855           | -76.060282      | -76.342325           | -76.065648      | -76.3759358 | 0.02141  |

**Table S3.** Calculated total electronic energies without zpe correction (E), zero point vibrational energies of various molecules and transitions States at the CASSCF level in conjunction with 6-311++G(3df,3pd) basis set as well as at the CASPT2/6-311++G(3df,3pd) level of theory. Active space of 10 electrons in 10 orbital's have been used for CASSCF and CASPT2 calculations.

| Molecules/Complexes/<br>Intermediates/<br>Transitions States | CASSCF (10, 10)/<br>6-311++G(3df,3pd) | CASSCF (10, 10)/<br>6-311++G(3df,3pd) | CASPT2 (10, 10)/<br>6-311++G(3df,3pd) |
|--------------------------------------------------------------|---------------------------------------|---------------------------------------|---------------------------------------|
|                                                              | E                                     | zpe                                   | E                                     |
| CH <sub>3</sub> NO                                           | -169.061856                           | 0.044287                              | -169.498478                           |
| (CH <sub>2</sub> NOH)-I                                      | -169.073712                           | 0.045214                              | -169.512148                           |
| (CH <sub>2</sub> NOH)-II                                     | -169.082894                           | 0.045622                              | -169.520669                           |
| HCN                                                          | -93.0285531                           | 0.016422                              | -93.249493                            |
| H <sub>2</sub> O                                             | -76.1104646                           | 0.02163                               | -76.3202899                           |
| HCN···H <sub>2</sub> O                                       | -169.1415188                          | 0.039388                              | -169.57819                            |
| TS-1                                                         | -168.943643                           | 0.038797                              | -169.400876                           |
| TS-2                                                         | -169.069786                           | 0.044389                              | -169.506733                           |
| TS-3                                                         | -168.961592                           | 0.038191                              | -169.417195                           |

**Table S4.** TST/Eckart and CVT/SCT methods computed rate constants ( $k$ , sec<sup>-1</sup>) of each unimolecular steps and overall rate constants for the unimolecular rearrangement of isolated decomposition of CH<sub>3</sub>NO at the CCSD(T)/6-311++G(3df,3pd) level of calculation. The values given in the first bracket correspond to CVT/SCT computed rate constants.

| T (K)  | $k_{TS-1}$                                          | $k_{TS-2}$            | $k_{TS-3}$                                          | $k_{uni}^{iso}$                                     |
|--------|-----------------------------------------------------|-----------------------|-----------------------------------------------------|-----------------------------------------------------|
| 298.15 | 7.10×10 <sup>-23</sup><br>(9.34×10 <sup>-21</sup> ) | 6.54×10 <sup>10</sup> | 6.23×10 <sup>-24</sup><br>(9.08×10 <sup>-26</sup> ) | 6.23×10 <sup>-24</sup><br>(9.08×10 <sup>-26</sup> ) |
| 318    | 1.49×10 <sup>-21</sup><br>(5.51×10 <sup>-20</sup> ) | 8.99×10 <sup>10</sup> | 1.94×10 <sup>-22</sup><br>(6.19×10 <sup>-24</sup> ) | 1.94×10 <sup>-22</sup><br>(6.19×10 <sup>-24</sup> ) |
| 343    | 4.50×10 <sup>-20</sup><br>(5.47×10 <sup>-19</sup> ) | 1.28×10 <sup>11</sup> | 9.89×10 <sup>-21</sup><br>(9.14×10 <sup>-22</sup> ) | 9.89×10 <sup>-21</sup><br>(9.14×10 <sup>-22</sup> ) |
| 358    | 2.99×10 <sup>-19</sup><br>(2.22×10 <sup>-18</sup> ) | 1.54×10 <sup>11</sup> | 9.36×10 <sup>-20</sup><br>(1.52×10 <sup>-20</sup> ) | 9.36×10 <sup>-20</sup><br>(1.52×10 <sup>-20</sup> ) |

**Table S5.** The CCSD(T)/6-311++G(3df,3pd) level calculated equilibrium constants ( $K_{eq}$ , cm<sup>3</sup>molecule<sup>-1</sup>sec<sup>-1</sup>) for the formation of CH<sub>3</sub>NO···CH<sub>3</sub>NO complex. TST/Eckart and CVT/SCT methods computed rate constants ( $k$ , sec<sup>-1</sup>) of each unimolecular steps and overall rate constants for unimolecular rearrangement for the bimolecular decomposition of CH<sub>3</sub>NO at the CCSD(T)/6-311++G(3df,3pd) level of calculation. The values given in the first bracket correspond to CVT/SCT computed rate constants.

| T (K)  | $K_{eq}^{CH_3NO \cdots CH_3NO}$ | $k_{TS-4}$                                          | $k_{TS-5}$            | $k_{TS-6}$                                          | $k_{uni}^{bi}$                                      |
|--------|---------------------------------|-----------------------------------------------------|-----------------------|-----------------------------------------------------|-----------------------------------------------------|
| 298.15 | 1.78×10 <sup>-25</sup>          | 4.09×10 <sup>-15</sup><br>(2.34×10 <sup>-15</sup> ) | 1.55×10 <sup>11</sup> | 3.09×10 <sup>-13</sup><br>(4.55×10 <sup>-14</sup> ) | 4.04×10 <sup>-15</sup><br>(2.23×10 <sup>-15</sup> ) |
| 318    | 1.57×10 <sup>-25</sup>          | 9.32×10 <sup>-14</sup><br>(6.51×10 <sup>-14</sup> ) | 2.02×10 <sup>11</sup> | 1.39×10 <sup>-11</sup><br>(2.24×10 <sup>-12</sup> ) | 9.26×10 <sup>-14</sup><br>(6.33×10 <sup>-14</sup> ) |
| 343    | 1.39×10 <sup>-25</sup>          | 3.21×10 <sup>-12</sup><br>(2.57×10 <sup>-12</sup> ) | 2.70×10 <sup>11</sup> | 9.10×10 <sup>-10</sup><br>(1.62×10 <sup>-10</sup> ) | 3.20×10 <sup>-12</sup><br>(2.53×10 <sup>-12</sup> ) |
| 358    | 1.31×10 <sup>-25</sup>          | 2.20×10 <sup>-11</sup><br>(1.85×10 <sup>-11</sup> ) | 3.16×10 <sup>11</sup> | 8.50×10 <sup>-9</sup><br>(1.59×10 <sup>-9</sup> )   | 2.20×10 <sup>-11</sup><br>(1.83×10 <sup>-11</sup> ) |

**Table S6.** The CCSD(T)/6-311++G(3df,3pd) level calculated equilibrium constants ( $K_{eq}$ ,  $\text{cm}^3\text{molecule}^{-1}\text{sec}^{-1}$ ) for the formation of  $\text{CH}_3\text{NO}\cdots\text{H}_2\text{O}$  complex. TST/Eckart and CVT/SCT methods computed rate constants ( $k$ ,  $\text{sec}^{-1}$ ) of each unimolecular steps and overall rate constants for unimolecular rearrangement for the  $\text{H}_2\text{O}$  assisted decomposition of  $\text{CH}_3\text{NO}$  at the CCSD(T)/6-311++G(3df,3pd) level of calculation. The values given in the first bracket correspond to CVT/SCT computed rate constants.

| T (K)  | $K_{eq}^{\text{CH}_3\text{NO}\cdots\text{H}_2\text{O}}$ | $k_{TS-8}$                                         | $k_{TS-9}$           | $k_{TS-10}$                                        | $k_{uni}^{HO}$                                     |
|--------|---------------------------------------------------------|----------------------------------------------------|----------------------|----------------------------------------------------|----------------------------------------------------|
| 298.15 | $7.80\times 10^{-23}$                                   | $8.09\times 10^{-15}$<br>( $3.24\times 10^{-13}$ ) | $6.36\times 10^9$    | $2.90\times 10^{-18}$<br>( $4.26\times 10^{-19}$ ) | $2.90\times 10^{-18}$<br>( $4.26\times 10^{-19}$ ) |
| 318    | $6.02\times 10^{-23}$                                   | $8.71\times 10^{-14}$<br>( $2.02\times 10^{-12}$ ) | $9.16\times 10^9$    | $5.40\times 10^{-17}$<br>( $1.67\times 10^{-17}$ ) | $5.40\times 10^{-17}$<br>( $1.67\times 10^{-17}$ ) |
| 343    | $4.60\times 10^{-23}$                                   | $1.63\times 10^{-12}$<br>( $1.90\times 10^{-11}$ ) | $1.37\times 10^{10}$ | $1.95\times 10^{-15}$<br>( $1.08\times 10^{-15}$ ) | $1.95\times 10^{-15}$<br>( $1.08\times 10^{-15}$ ) |
| 358    | $4.01\times 10^{-23}$                                   | $8.82\times 10^{-12}$<br>( $7.09\times 10^{-11}$ ) | $1.70\times 10^{10}$ | $1.55\times 10^{-14}$<br>( $1.06\times 10^{-14}$ ) | $1.55\times 10^{-14}$<br>( $1.06\times 10^{-14}$ ) |

**Table S7.** The CCSD(T)/6-311++G(3df,3pd) level calculated equilibrium constants ( $K_{eq}$ ,  $\text{cm}^3\text{molecule}^{-1}\text{sec}^{-1}$ ) for the formation of  $\text{CH}_3\text{NO}\cdots\text{NH}_3$  complex. TST/Eckart and CVT/SCT methods computed rate constants ( $k$ ,  $\text{sec}^{-1}$ ) of each unimolecular steps and overall rate constants for unimolecular rearrangement for the  $\text{NH}_3$  assisted decomposition of  $\text{CH}_3\text{NO}$  at the CCSD(T)/6-311++G(3df,3pd) level of calculation. The values given in the first bracket correspond to CVT/SCT computed rate constants.

| T (K)  | $K_{eq}^{\text{CH}_3\text{NO}\cdots\text{NH}_3}$ | $k_{TS-11}$                                      | $k_{TS-12}$       | $k_{TS-13}$                                        | $k_{uni}^{\text{NH}_3}$                            |
|--------|--------------------------------------------------|--------------------------------------------------|-------------------|----------------------------------------------------|----------------------------------------------------|
| 298.15 | $5.20\times 10^{-24}$                            | $3.24\times 10^{-9}$<br>( $1.93\times 10^{-9}$ ) | $2.39\times 10^8$ | $1.29\times 10^{-20}$<br>( $1.04\times 10^{-19}$ ) | $1.29\times 10^{-20}$<br>( $1.04\times 10^{-19}$ ) |
| 318    | $4.59\times 10^{-24}$                            | $4.52\times 10^{-8}$<br>( $2.63\times 10^{-8}$ ) | $4.67\times 10^8$ | $1.00\times 10^{-18}$<br>( $4.98\times 10^{-18}$ ) | $1.00\times 10^{-18}$<br>( $4.98\times 10^{-18}$ ) |
| 343    | $4.08\times 10^{-24}$                            | $8.28\times 10^{-7}$<br>( $4.72\times 10^{-7}$ ) | $9.79\times 10^8$ | $1.20\times 10^{-16}$<br>( $4.02\times 10^{-16}$ ) | $1.20\times 10^{-16}$<br>( $4.02\times 10^{-16}$ ) |
| 358    | $3.85\times 10^{-24}$                            | $3.93\times 10^{-6}$<br>( $2.22\times 10^{-6}$ ) | $1.46\times 10^9$ | $1.54\times 10^{-15}$<br>( $4.38\times 10^{-15}$ ) | $1.54\times 10^{-15}$<br>( $4.38\times 10^{-15}$ ) |

**Table S8.** The CCSD(T)/6-311++G(3df,3pd) level calculated equilibrium constants ( $K_{eq}$ ,  $\text{cm}^3\text{molecule}^{-1}\text{sec}^{-1}$ ) for the formation of  $\text{CH}_3\text{NO}\cdots\text{HCl}$  complex. TST/Eckart and CVT/SCT methods computed rate constants ( $k$ ,  $\text{sec}^{-1}$ ) of each unimolecular steps and overall rate constants for unimolecular rearrangement for the  $\text{HCl}$  assisted decomposition of  $\text{CH}_3\text{NO}$  at the CCSD(T)/6-311++G(3df,3pd) level of calculation. The values given in the first bracket correspond to CVT/SCT computed rate constants.

| T (K)  | $K_{eq}^{\text{CH}_3\text{NO}\cdots\text{HCl}}$ | $k_{TS-14}$                                        | $k_{TS-15}$          | $k_{TS-16}$                                        | $k_{uni}^{\text{HCl}}$                             |
|--------|-------------------------------------------------|----------------------------------------------------|----------------------|----------------------------------------------------|----------------------------------------------------|
| 298.15 | $2.60\times 10^{-23}$                           | $1.94\times 10^{-11}$<br>( $1.72\times 10^{-10}$ ) | $1.29\times 10^{11}$ | $3.93\times 10^{-13}$<br>( $2.27\times 10^{-13}$ ) | $3.93\times 10^{-13}$<br>( $2.27\times 10^{-13}$ ) |
| 318    | $2.00\times 10^{-23}$                           | $3.59\times 10^{-10}$<br>( $1.68\times 10^{-9}$ )  | $1.65\times 10^{11}$ | $1.17\times 10^{-11}$<br>( $6.85\times 10^{-12}$ ) | $1.17\times 10^{-11}$<br>( $6.82\times 10^{-12}$ ) |
| 343    | $1.52\times 10^{-23}$                           | $9.01\times 10^{-9}$<br>( $2.63\times 10^{-8}$ )   | $2.15\times 10^{11}$ | $4.85\times 10^{-10}$<br>( $2.88\times 10^{-10}$ ) | $4.85\times 10^{-10}$<br>( $2.88\times 10^{-10}$ ) |
| 358    | $1.32\times 10^{-23}$                           | $5.07\times 10^{-8}$<br>( $1.23\times 10^{-7}$ )   | $2.49\times 10^{11}$ | $3.55\times 10^{-9}$<br>( $2.12\times 10^{-9}$ )   | $3.55\times 10^{-9}$<br>( $2.12\times 10^{-9}$ )   |

**Table S9.** The CCSD(T)/6-311++G(3df,3pd) level calculated equilibrium constants ( $K_{eq}$ ,  $\text{cm}^3\text{molecule}^{-1}\text{sec}^{-1}$ ) for the formation of  $\text{CH}_3\text{NO}\cdots\text{HCOOH}$  complex. TST/Eckart and CVT/SCT methods computed rate constants ( $k$ ,  $\text{sec}^{-1}$ ) of each unimolecular steps and overall rate constants for unimolecular rearrangement for the HCOOH assisted decomposition of  $\text{CH}_3\text{NO}$  at the CCSD(T)/6-311++G(3df,3pd) level of calculation. The values given in the first bracket correspond to CVT/SCT computed rate constants.

| T (K)  | $K_{eq}^{\text{CH}_3\text{NO}\cdots\text{HCOOH}}$ | $k_{TS-17}$                                      | $k_{TS-18}$          | $k_{TS-19}$                                        | $k_{uni}^{\text{HCOOH}}$                           |
|--------|---------------------------------------------------|--------------------------------------------------|----------------------|----------------------------------------------------|----------------------------------------------------|
| 298.15 | $3.02\times 10^{-23}$                             | $2.80\times 10^{-4}$<br>( $6.98\times 10^{-4}$ ) | $3.32\times 10^{10}$ | $6.06\times 10^{-14}$<br>( $2.49\times 10^{-14}$ ) | $6.06\times 10^{-14}$<br>( $2.49\times 10^{-14}$ ) |
| 318    | $1.87\times 10^{-23}$                             | $1.23\times 10^{-3}$<br>( $3.03\times 10^{-3}$ ) | $5.00\times 10^{10}$ | $1.59\times 10^{-12}$<br>( $7.02\times 10^{-13}$ ) | $1.59\times 10^{-12}$<br>( $7.02\times 10^{-13}$ ) |
| 343    | $1.11\times 10^{-23}$                             | $7.30\times 10^{-3}$<br>( $1.67\times 10^{-2}$ ) | $7.86\times 10^{10}$ | $6.25\times 10^{-11}$<br>( $2.89\times 10^{-11}$ ) | $6.25\times 10^{-11}$<br>( $2.89\times 10^{-11}$ ) |
| 358    | $8.48\times 10^{-24}$                             | $2.00\times 10^{-2}$<br>( $4.32\times 10^{-2}$ ) | $1.00\times 10^{11}$ | $4.55\times 10^{-10}$<br>( $2.14\times 10^{-10}$ ) | $4.55\times 10^{-10}$<br>( $2.14\times 10^{-10}$ ) |

**Table S10.** The CCSD(T)/6-311++G(3df,3pd) level calculated equilibrium constants ( $K_{eq}$ ,  $\text{cm}^3\text{molecule}^{-1}\text{sec}^{-1}$ ) for the formation of  $\text{CH}_3\text{NO}\cdots\text{HNO}_3$  complex. TST/Eckart and CVT/SCT methods computed rate constants ( $k$ ,  $\text{sec}^{-1}$ ) of each unimolecular steps and overall rate constants for unimolecular rearrangement for the  $\text{HNO}_3$  assisted decomposition of  $\text{CH}_3\text{NO}$  at the CCSD(T)/6-311++G(3df,3pd) level of calculation. The values given in the first bracket correspond to CVT/SCT computed rate constants.

| T (K)  | $K_{eq}^{\text{CH}_3\text{NO}\cdots\text{HNO}_3}$ | $k_{TS-20}$                                      | $k_{TS-21}$          | $k_{TS-22}$                                        | $k_{uni}^{\text{HNO}_3}$                           |
|--------|---------------------------------------------------|--------------------------------------------------|----------------------|----------------------------------------------------|----------------------------------------------------|
| 298.15 | $5.81\times 10^{-23}$                             | $3.87\times 10^{-7}$<br>( $3.10\times 10^{-6}$ ) | $1.24\times 10^{11}$ | $3.27\times 10^{-13}$<br>( $1.85\times 10^{-13}$ ) | $3.27\times 10^{-13}$<br>( $1.85\times 10^{-13}$ ) |
| 318    | $3.28\times 10^{-23}$                             | $2.73\times 10^{-6}$<br>( $1.61\times 10^{-5}$ ) | $1.66\times 10^{11}$ | $7.58\times 10^{-12}$<br>( $5.20\times 10^{-12}$ ) | $7.58\times 10^{-12}$<br>( $5.20\times 10^{-12}$ ) |
| 343    | $1.77\times 10^{-23}$                             | $2.75\times 10^{-5}$<br>( $1.13\times 10^{-4}$ ) | $2.30\times 10^{11}$ | $2.68\times 10^{-10}$<br>( $2.10\times 10^{-10}$ ) | $2.68\times 10^{-10}$<br>( $2.10\times 10^{-10}$ ) |
| 358    | $1.28\times 10^{-23}$                             | $9.99\times 10^{-5}$<br>( $3.44\times 10^{-4}$ ) | $2.74\times 10^{11}$ | $1.87\times 10^{-9}$<br>( $1.53\times 10^{-9}$ )   | $1.87\times 10^{-9}$<br>( $1.53\times 10^{-9}$ )   |

**Table S11.** The CCSD(T)/6-311++G(3df,3pd) level calculated equilibrium constants ( $K_{eq}$ ,  $\text{cm}^3\text{molecule}^{-1}\text{sec}^{-1}$ ) for the formation of  $\text{CH}_3\text{NO}\cdots\text{H}_2\text{SO}_4$  complex. TST/Eckart and CVT/SCT methods computed rate constants ( $k$ ,  $\text{sec}^{-1}$ ) of each unimolecular steps and overall rate constants for unimolecular rearrangement for the  $\text{H}_2\text{SO}_4$  assisted decomposition of  $\text{CH}_3\text{NO}$  at the CCSD(T)/6-311++G(3df,3pd) level of calculation. The values given in the first bracket correspond to CVT/SCT computed rate constants.

| T (K)  | $K_{eq}^{\text{CH}_3\text{NO}\cdots\text{H}_2\text{SO}_4}$ | $k_{TS-23}$                                      | $k_{TS-24}$          | $k_{TS-25}$                                        | $k_{uni}^{\text{H}_2\text{SO}_4}$                  |
|--------|------------------------------------------------------------|--------------------------------------------------|----------------------|----------------------------------------------------|----------------------------------------------------|
| 298.15 | $2.19\times 10^{-21}$                                      | $1.84\times 10^{-4}$<br>( $9.09\times 10^{-4}$ ) | $2.55\times 10^{12}$ | $1.35\times 10^{-10}$<br>( $1.94\times 10^{-11}$ ) | $1.35\times 10^{-10}$<br>( $1.94\times 10^{-11}$ ) |
| 318    | $9.70\times 10^{-22}$                                      | $1.20\times 10^{-3}$<br>( $4.28\times 10^{-3}$ ) | $2.76\times 10^{12}$ | $2.53\times 10^{-9}$<br>( $4.41\times 10^{-10}$ )  | $2.53\times 10^{-9}$<br>( $4.41\times 10^{-10}$ )  |
| 343    | $4.02\times 10^{-22}$                                      | $9.99\times 10^{-3}$<br>( $2.63\times 10^{-2}$ ) | $3.00\times 10^{12}$ | $6.80\times 10^{-8}$<br>( $1.39\times 10^{-8}$ )   | $6.80\times 10^{-8}$<br>( $1.39\times 10^{-8}$ )   |
| 358    | $2.50\times 10^{-22}$                                      | $3.17\times 10^{-2}$<br>( $7.26\times 10^{-2}$ ) | $3.14\times 10^{12}$ | $4.04\times 10^{-7}$<br>( $8.78\times 10^{-8}$ )   | $4.04\times 10^{-7}$<br>( $8.78\times 10^{-8}$ )   |

**Figure S1.** Images of CASSCF(10,10)/6-311++G(3df,3pd) level optimized active space orbital's of  $\text{CH}_3\text{NO}$  molecule.

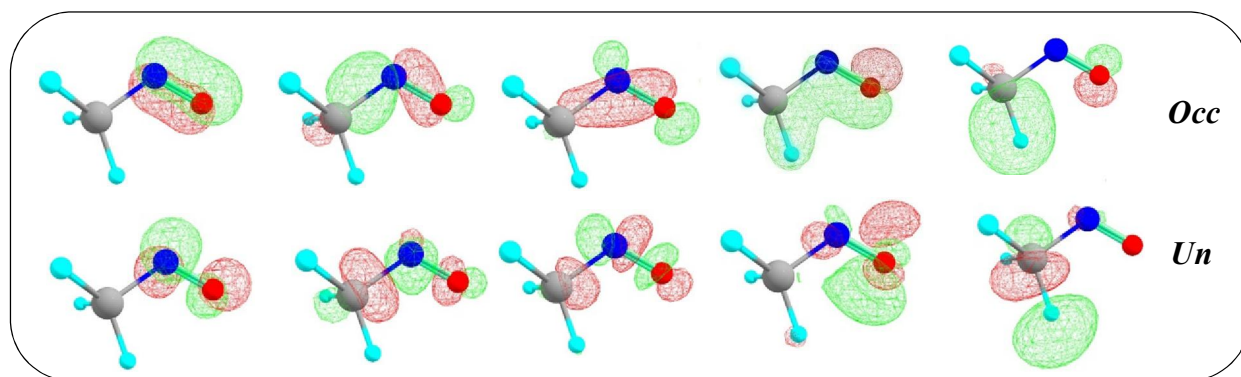



**Figure S2.** Temperature and pressure dependent Bartis-Widom phenomenological rate coefficients for CH<sub>3</sub>NO to HCN conversion via (A) unimolecular, (B) bimolecular decomposition pathways and via (C) H<sub>2</sub>O, (D) NH<sub>3</sub>, (E) HCl, (F) HCOOH, (G) HNO<sub>3</sub>, (H) H<sub>2</sub>SO<sub>4</sub> assistance.

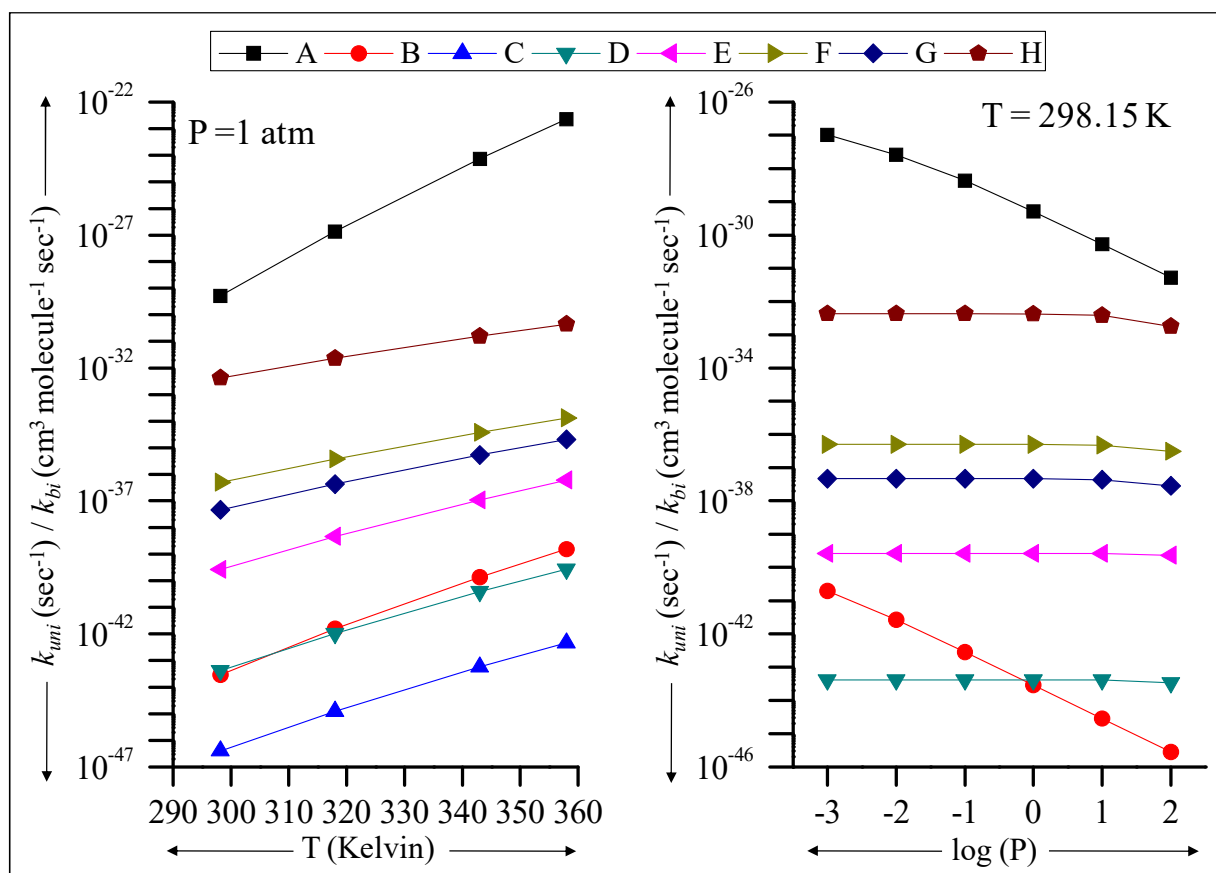

**Figure S3.** CVT/SCT computed rate coefficients for  $\text{CH}_3\text{NO}$  to  $(\text{CH}_2\text{NOH})\text{-I}$  conversion via (A)  $\text{H}_2\text{O}$ , (B)  $\text{NH}_3$ , (C)  $\text{HCl}$ , (D)  $\text{HCOOH}$ , (E)  $\text{HNO}_3$  and (F)  $\text{H}_2\text{SO}_4$  assisted decomposition pathways.

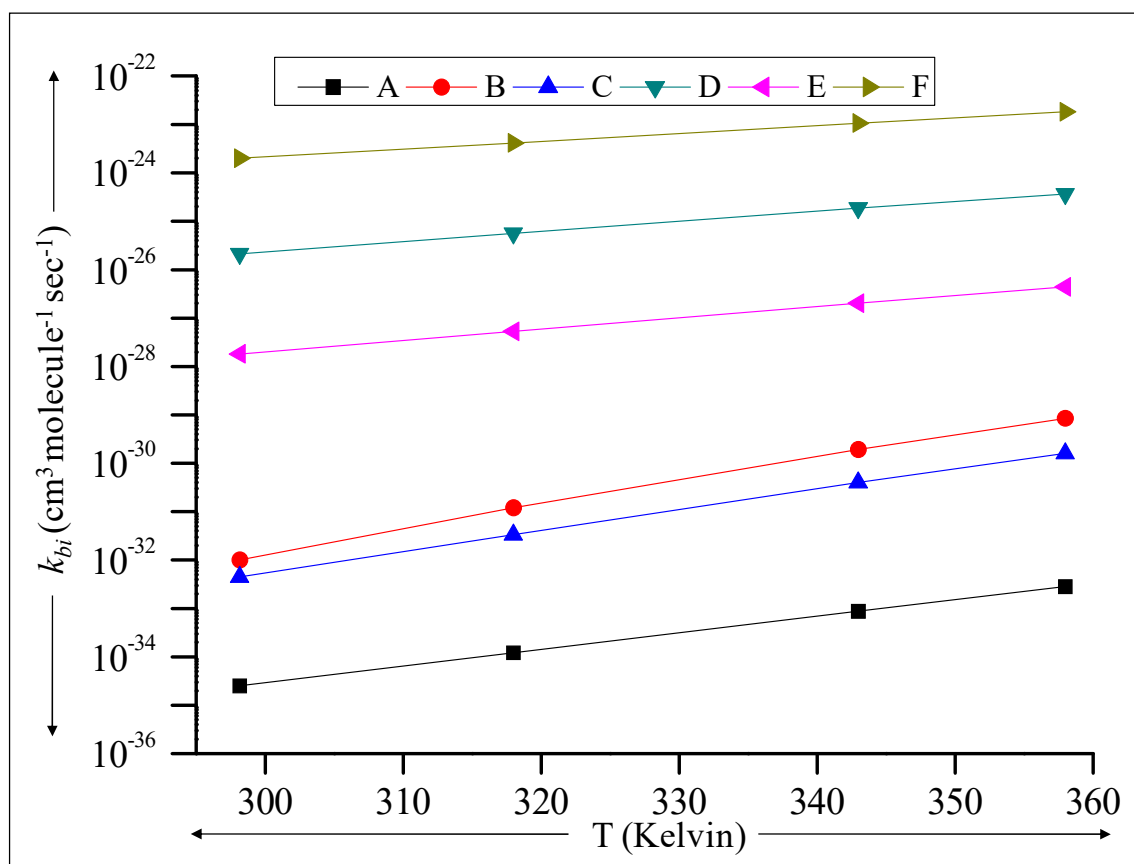

**Cartesian coordinates of M06-2X/6-311++G(3df,3pd) level's optimized geometries.**

|                                        |                                                                                                                                                                                                                                                                                                                                                                                                                                   |
|----------------------------------------|-----------------------------------------------------------------------------------------------------------------------------------------------------------------------------------------------------------------------------------------------------------------------------------------------------------------------------------------------------------------------------------------------------------------------------------|
| <b>CH<sub>3</sub>NO</b>                | C,0,0.002560313,-0.000343391,-0.0017985589<br>H,0,-0.0015829687,-0.0032534197,1.0875808997<br>H,0,1.0125428579,0.0038854942,-0.4057504818<br>H,0,-0.5731338009,0.8639665295,-0.331203362<br>O,0,-0.1084552154,-1.927520701,-1.1289316784<br>N,0,-0.7414462536,-1.1986670779,-0.4338140011                                                                                                                                         |
| <b>(CH<sub>2</sub>NOH)-I</b>           | C,0,-0.0645849987,0.9022005774,0.7431025338<br>H,0,-0.564132294,1.209859854,1.6497250101<br>H,0,0.8877503907,0.0813038858,-1.1447495676<br>H,0,0.625220221,1.5861640421,0.2459834718<br>O,0,0.3172396337,-0.6389712895,-0.835151099<br>N,0,-0.3166149529,-0.2551010698,0.3102646508                                                                                                                                               |
| <b>(CH<sub>2</sub>NOH)-II</b>          | C,0,-0.0672132757,0.8781114469,0.7311735756<br>H,0,-0.5555471524,1.2074801793,1.6362407668<br>H,0,0.0446615246,-1.4870240068,-1.0366527139<br>H,0,0.6252383894,1.5248791091,0.2004696558<br>O,0,0.3374487845,-0.5964464451,-0.8319145306<br>N,0,-0.3425411904,-0.2844711434,0.3286676262                                                                                                                                          |
| <b>HCN</b>                             | C,0,0.,0.,-0.0002368384<br>H,0,0.,0.,1.0657278922<br>N,0,0.,0.,-1.1420910538                                                                                                                                                                                                                                                                                                                                                      |
| <b>CH<sub>3</sub>N(OH)<sub>2</sub></b> | O,0,0.022187099,-0.6349551521,-1.3350954985<br>H,0,0.5893203574,-0.148068526,-1.954935511<br>H,0,-0.0904240751,1.1812067267,0.5314009456<br>O,0,0.7406626566,0.9112956469,0.1302633632<br>N,0,0.5857520631,-0.4731061348,-0.070443865<br>C,0,1.9436425036,-0.994362503,-0.1007391072<br>H,0,2.3814077826,-0.8621993184,0.8837180188<br>H,0,1.8857687075,-2.0490213811,-0.348860661<br>H,0,2.5464479053,-0.4614393581,-0.845103685 |
| <b>H<sub>2</sub>O</b>                  | H,0,3.5570575294,0.136514371,-0.9314714521<br>H,0,3.0079175243,-0.1598070934,-2.3185225289<br>O,0,2.7410569464,-0.0220772776,-1.408463019                                                                                                                                                                                                                                                                                         |
| <b>NH<sub>3</sub></b>                  | N,0,-0.0161871708,0.0282959422,-0.0113732791<br>H,0,0.0058122228,-0.0105204612,1.0004515514<br>H,0,0.9451709677,-0.0105589485,-0.3280288621<br>H,0,-0.4633914289,-0.8237132348,-0.3277158788                                                                                                                                                                                                                                      |
| <b>HCl</b>                             | H,0,0.,0.,0.0207330095<br>Cl,0,0.,0.,1.2973990905                                                                                                                                                                                                                                                                                                                                                                                 |
| <b>HCOOH</b>                           | H,0,0.3141193059,-0.6541984014,-0.4392162473<br>O,0,1.9452166723,0.3133577541,0.8854556155<br>C,0,1.7404730528,0.5480221777,-0.2642022199                                                                                                                                                                                                                                                                                         |

O,0,0.7879822176,-0.0280637538,-1.0035108062  
H,0,2.3024937514,1.2672062233,-0.8687993421

**HNO<sub>3</sub>**

O,0,0.838059596,0.7036362107,-0.6661995475  
N,0,1.5115735716,-0.1929135149,-0.2397518849  
O,0,0.9681908254,-0.9058235916,0.8039528014  
H,0,0.1106685203,-0.4795375584,0.9519198915  
O,0,2.5832684867,-0.5662585458,-0.5796242606

**H<sub>2</sub>SO<sub>4</sub>**

O,0,3.1193249909,-0.5559319147,-0.3565766031  
S,0,4.1058418679,-0.0398509533,0.5127787692  
O,0,3.3887530062,0.6901794206,1.7097114658  
H,0,2.5175985994,0.2976104161,1.8553452047  
O,0,5.1429147942,0.8245710705,0.0974388141  
O,0,4.7483657465,-1.2881518037,1.226118996  
H,0,5.6051579949,-1.0429052355,1.5996403532

**CH<sub>3</sub>NO<sup>+</sup>CH<sub>3</sub>NO**

C,0,0.0618593761,0.1073900223,0.0073816641  
N,0,0.4250871023,-0.4313533674,1.3275325473  
O,0,1.3800800303,-1.143910859,1.3091584804  
H,0,-0.9841137773,-0.146827138,-0.1600341073  
H,0,0.1360564601,1.1918827502,0.0887354765  
H,0,0.7159552093,-0.2778936905,-0.7712067392  
O,0,2.7816430883,1.413395081,0.3832289443  
N,0,3.5842368816,1.0603629423,1.1904423796  
C,0,4.2311798549,-0.2199952456,0.8636966406  
H,0,5.3045183589,-0.0332839862,0.8506015788  
H,0,4.0167768523,-0.8937341258,1.6929026786  
H,0,3.8652193574,-0.6192276201,-0.0793119366

**CH<sub>3</sub>NO<sup>+</sup>H<sub>2</sub>O**

C,0,0.0192372228,-0.0078770387,-0.0156083378  
H,0,0.0256334863,-0.013661194,1.0742717676  
H,0,1.0245357154,-0.0029304574,-0.4309945618  
H,0,3.2035306489,-1.6476787792,-2.3051855832  
H,0,-0.5611491688,0.8590803128,-0.3306728952  
O,0,2.6081536174,-1.1359166098,-1.7557916843  
H,0,1.7833332922,-1.6330559362,-1.7211283464  
O,0,-0.1542901019,-1.9471567616,-1.1300497246  
N,0,-0.7520061694,-1.1913621925,-0.4267726405

**CH<sub>3</sub>NO<sup>+</sup>NH<sub>3</sub>**

C,0,-1.0931088618,1.0089510295,-0.0159488538  
H,0,-1.5027027152,0.6540227335,0.9274862882  
H,0,-0.2891815232,1.7260131457,0.1467247057  
H,0,2.213968247,-0.0177875622,-0.0274698441  
H,0,-1.8489518183,1.4665166326,-0.6525204102  
H,0,1.5656139769,-0.422652806,1.4014652317  
O,0,-0.4846731219,-1.1355548654,-0.2005882142  
N,0,-0.4931398376,-0.0946430396,-0.7810823504  
N,0,1.9764930615,0.3484890909,0.8874100901  
H,0,2.8475335926,0.5823566409,1.347687357

**CH<sub>3</sub>NO<sup>+</sup>HCl**

C,0,0.0342298531,0.0090173554,-0.0257529924

H,0,0.0435779471,0.0151131958,1.0638063216  
H,0,2.5260785949,-0.0187570568,-1.80804741  
H,0,-0.9866683882,0.2171697447,-0.3446856344  
O,0,1.2805416864,-1.484259416,-1.1407183447  
N,0,0.3253367089,-1.3730246892,-0.4358444712  
H,0,0.7450884592,0.7189423908,-0.4430395494  
Cl,0,3.1762831767,1.052628777,-2.1012154509

**CH<sub>3</sub>NO···HCOOH**

C,0,-1.719622515,0.1532681227,-0.9469367247  
N,0,-1.8571666565,-0.577292627,0.3160595926  
O,0,-1.103666069,-0.2297250063,1.1743905022  
H,0,-1.0604535839,1.0133567242,-0.8517843408  
H,0,-1.3123806895,-0.5630191025,-1.6614393575  
H,0,-2.7242297413,0.4269214462,-1.2639938803  
O,0,1.2351136237,-0.5666907816,-0.9724755484  
C,0,1.8888495706,0.2229125264,-0.3542892351  
O,0,1.4692276707,0.8996809318,0.7055541446  
H,0,0.5547609697,0.6231935746,0.9102443458  
H,0,2.9236644206,0.4861071914,-0.5977344982

**CH<sub>3</sub>NO···HNO<sub>3</sub>**

C,0,-2.0953451839,-0.072558805,-0.8559563382  
N,0,-2.2605628923,0.6420126291,0.4130268207  
O,0,-1.4622177628,0.3558130719,1.2539098366  
H,0,-3.0850108402,-0.403604662,-1.1638843602  
H,0,-1.7469233943,0.6728095454,-1.5726750924  
H,0,-1.386224178,-0.8940183994,-0.7779865  
O,0,0.8431266243,0.7046008353,-0.6732359972  
N,0,1.5114631156,-0.1979603203,-0.233554197  
O,0,0.9712308354,-0.9051247181,0.7937576346  
H,0,0.0998158286,-0.4802365297,0.9660657938  
O,0,2.5861238476,-0.5621756472,-0.5827366007

**CH<sub>3</sub>NO···H<sub>2</sub>SO<sub>4</sub>**

C,0,0.2419199742,0.2072397963,0.1368420006  
N,0,0.2074136669,-0.8006249639,1.1966833715  
O,0,1.0762630521,-0.7033607798,2.01191356  
H,0,-0.7718390762,0.5915085333,0.0392244946  
H,0,0.9725132208,0.9896616711,0.3284645768  
H,0,0.4925942405,-0.3338225362,-0.7766375914  
O,0,3.1236172709,-0.5488873089,-0.3653917263  
S,0,4.1055460028,-0.0281146626,0.5150081492  
O,0,3.3951241025,0.700474885,1.6941336704  
H,0,2.5294982055,0.2661559577,1.8809748327  
O,0,5.1476442414,0.8216255577,0.0775312106  
O,0,4.7430243587,-1.2868806646,1.2178666209  
H,0,5.5835035624,-1.0388533088,1.6243343605

**HCN···H<sub>2</sub>O**

C,0,-0.1576694317,-0.0045726035,-0.2742668974  
H,0,0.8462567065,-0.0117687596,-0.6580089212  
H,0,3.5572071953,0.1372469248,-0.9274280494  
H,0,3.0052659823,-0.1605903601,-2.3215767069  
O,0,2.743559001,-0.0220269153,-1.4094517902  
N,0,-1.2252192136,0.0038451083,0.1328393333

**HCN...CH<sub>3</sub>N(OH)<sub>2</sub>**  
C,0,-2.1999635872,-0.0817473859,0.4345095887  
N,0,-2.2436884898,0.8890880917,1.036038239  
O,0,0.0297679544,-0.6518483242,-1.346593414  
H,0,0.5553838463,-0.1128508093,-1.9591520291  
H,0,-2.1252178332,-0.9740955247,-0.1469039175  
H,0,-0.085349744,1.1801581005,0.5383607333  
O,0,0.7386164141,0.9066279882,0.1123442097  
N,0,0.5921670743,-0.4699893557,-0.0734662197  
C,0,1.9484604545,-0.9980837657,-0.0958792784  
H,0,2.379130306,-0.8600233049,0.8908755032  
H,0,1.890460419,-2.0542074279,-0.3376321382  
H,0,2.5561301854,-0.4704342823,-0.838655277

**HCN...CH<sub>3</sub>NO...H<sub>2</sub>O**  
C,0,0.0035741176,-0.0025768262,0.008880155  
N,0,-0.0058157163,0.0050656492,1.1516720958  
O,0,1.8434993343,0.0267818099,-2.3774403297  
H,0,3.261149957,1.1506883594,1.6033701195  
H,0,0.0513883347,0.0050230565,-1.0615565058  
H,0,2.2792365142,0.0871916342,1.1350718118  
O,0,3.1732019617,0.4162859034,0.9932093852  
N,0,2.3743338143,-0.7125597237,-1.6046796558  
C,0,3.812568915,-0.8820870846,-1.821356602  
H,0,4.2834453953,-0.5388177103,-0.9002137138  
H,0,3.9933900217,-1.9521362299,-1.9161108465  
H,0,4.1474803504,-0.3263058378,-2.6941349137

**(CH<sub>2</sub>NOH...H<sub>2</sub>O)-I**  
C,0,0.0089570657,-0.0088864252,-0.0025533272  
H,0,0.0008450315,0.0040855913,1.0865043745  
H,0,2.4851490994,-0.0202107011,3.2886145321  
H,0,1.9022674272,-1.4332856717,3.3433610766  
H,0,-0.8678756333,0.2960552061,-0.555110906  
O,0,1.8142167314,-0.5863591672,2.9001466471  
H,0,1.9446240597,-0.6871355579,0.9737204945  
O,0,2.1188075705,-0.7559845812,0.0181638672  
N,0,1.0121950083,-0.369387039,-0.6814510814

**(CH<sub>2</sub>NOH...H<sub>2</sub>O)-II**  
C,0,0.0323154339,0.0004881155,0.0145319547  
H,0,0.0912660974,0.0771834054,1.0961647227  
H,0,2.2844839707,0.00684981,1.6927589949  
H,0,2.7592316438,0.6565551409,3.0000269942  
H,0,-0.7797183014,0.4568878994,-0.5327710856  
O,0,2.0466772942,0.66117188,2.35987846  
H,0,2.4918055433,-1.5607266607,-0.5181575854  
O,0,1.898303984,-1.152408204,0.1158936351  
N,0,0.8968399527,-0.600567538,-0.6787338737

**HCN...H<sub>2</sub>O...H<sub>2</sub>O**  
C,0,0.022076037,0.0141777982,0.0479248914  
H,0,0.0135573208,0.0212772689,2.8893860325  
H,0,1.9752396547,-0.0596106639,1.5957464131  
H,0,-1.3133359005,-0.4342449893,3.5300670853  
H,0,-0.850309772,0.0138941227,0.67530478

O,0,-0.9505531108,0.0390854854,2.7807166477  
H,0,2.4065678931,0.7603800588,2.8149213397  
O,0,1.8676978039,0.0119503898,2.5510083997  
N,0,1.0015002382,0.009436454,-0.5418989014

**(CH<sub>2</sub>NOH···NH<sub>3</sub>)-I**

C,0,-0.0066436147,-0.0380445561,0.0029036893  
N,0,-0.0012254438,0.0383255894,1.265143389  
O,0,1.2135204439,0.1065330279,1.8737121278  
N,0,3.6624532565,0.0316189346,0.3102445998  
H,0,0.9030230272,-0.0492396815,-0.595083351  
H,0,3.849463526,-0.7216453143,-0.34063247  
H,0,4.2880796503,-0.0948150756,1.0975618286  
H,0,-0.971448999,-0.0934682071,-0.4798289991  
H,0,1.9352718994,0.0763495418,1.2097723436  
H,0,3.9286669589,0.8968730727,-0.1442481383

**(CH<sub>2</sub>NOH···NH<sub>3</sub>)-II**

C,0,0.0000465028,0.001418544,0.0002900359  
H,0,-0.001802874,-0.0238457755,1.0872198907  
H,0,1.9311677141,-0.0436987673,2.3840597309  
H,0,1.5287194138,-0.6674077691,3.8393574887  
H,0,-0.9188763339,0.0857064628,-0.5620962993  
H,0,2.9088142066,-0.2092434805,-0.5020956763  
O,0,2.1843586018,-0.1688863729,0.1255486175  
N,0,1.0589159073,-0.0611437455,-0.682500238  
N,0,1.3111507535,0.0685725891,3.1790812203  
H,0,1.5519107519,0.9450641587,3.625149822

**HCN···NH<sub>3</sub>···H<sub>2</sub>O**

C,0,0.0156320316,-0.0351818319,-0.0131153567  
N,0,-0.1040115224,0.0036440612,1.1206282516  
O,0,0.8328903996,0.0843160826,4.1363987667  
N,0,-1.2310591419,0.617915064,6.2079029717  
H,0,-1.0562975073,1.5327658392,6.6047303653  
H,0,0.0911079912,0.2710922255,4.7294287359  
H,0,-2.2243802357,0.5491475743,6.0265846188  
H,0,0.129560148,-0.0716213081,-1.0728189045  
H,0,0.4581855316,0.063694422,3.2523137263  
H,0,-1.0038908758,-0.0676051154,6.917608544

**(CH<sub>2</sub>NOH···HCl)-I**

C,0,0.0143573324,0.0152565136,-0.0078109275  
H,0,0.0173051947,0.0289579773,1.0718903214  
H,0,0.2016804918,-0.0153896415,-2.2730237783  
H,0,-0.926977969,0.1199805962,-0.5484759293  
O,0,1.1095671906,-0.1402066958,-1.9546612113  
N,0,1.1276403957,-0.1245853754,-0.5812219922  
H,0,2.2287869139,1.4434133615,-2.4213450731  
Cl,0,2.6252009501,2.6138981674,-2.7790821045

**(CH<sub>2</sub>NOH···HCl)-II**

C,0,0.0052020734,-0.0238109838,-0.026510126  
H,0,-0.0215570127,-0.0379570752,1.0529162333  
H,0,1.972097815,0.0521551685,-2.2385754878  
H,0,-0.9120901316,-0.0396424167,-0.6076927745  
O,0,1.0567870166,0.0180731639,-1.9482973511

N,0,1.1470970834,0.0091996962,-0.5592270814  
H,0,0.0421773688,-1.5598932892,-2.4092363838  
Cl,0,-0.7471872759,-2.5789714377,-2.4527421513

**HCN···HCl···H<sub>2</sub>O**

C,0,0.063897819,0.0091552355,-0.0337330948  
H,0,0.1562728999,0.0306346289,1.0294276187  
H,0,1.7459959546,-0.0371840664,-2.2457038759  
H,0,3.073671379,0.1682047953,-0.5598600358  
O,0,2.7120246099,-0.02578604,-2.2207806205  
N,0,-0.0195603501,-0.0129721867,-1.1719450734  
H,0,2.985829446,0.7091699718,-2.7741516124  
Cl,0,3.2744149293,0.3195960388,0.7340698307

**(CH<sub>2</sub>NOH···HCOOH)-I**

C,0,-1.8773748075,0.514179581,-0.8245858318  
N,0,-1.6987248494,-0.6038928019,-0.2664096429  
O,0,-0.8796064151,-0.5956727642,0.8443588792  
H,0,-1.4255266,1.4393328415,-0.470799224  
H,0,0.7324441962,-1.1867075523,0.090975837  
H,0,-2.514653483,0.5209208307,-1.6972307888  
O,0,1.5990165526,-1.0573227421,-0.3467791505  
C,0,1.8828115019,0.2295161844,-0.3830801886  
O,0,1.1981350337,1.112783885,0.0627619185  
H,0,-0.4712713375,0.2858515263,0.9288419607  
H,0,2.8419652079,0.4061350116,-0.8794677688

**(CH<sub>2</sub>NOH···HCOOH)-II**

C,0,-1.8575699026,0.4181639903,-0.5527546904  
N,0,-2.0413420147,-0.236390093,0.5091263875  
O,0,-0.970171631,-1.0983048717,0.7639645177  
H,0,-0.9653964356,0.3142243923,-1.1643857795  
H,0,0.693720636,-0.3590154775,0.7364567157  
H,0,-2.6443123992,1.1095337506,-0.8188358294  
O,0,1.5998251051,0.0033027642,0.8213632244  
C,0,1.9962078718,0.5034945226,-0.3377662125  
O,0,1.3445817624,0.5343202708,-1.3420082642  
H,0,-1.2262572052,-1.546433976,1.574010861  
H,0,3.0159522131,0.8962547273,-0.2606159303

**HCN···HCOOH···H<sub>2</sub>O**

C,0,-2.096471794,0.9005760886,-0.6946153781  
N,0,-2.433865937,0.3926982297,0.2703683716  
O,0,-0.2446178352,-1.5383608313,0.898848994  
H,0,0.3076274515,-0.6705398656,-0.428966346  
H,0,0.4093898797,-1.1208910511,1.4753407115  
H,0,-1.7652088099,1.3645055967,-1.5967293106  
O,0,1.9459275574,0.3165896395,0.8833004053  
C,0,1.7334270085,0.5474023578,-0.2759739049  
O,0,0.789308137,-0.0171904744,-1.0080726357  
H,0,-1.0975774122,-1.1637830669,1.1456512614  
H,0,2.3139947541,1.2700623771,-0.8605601687

**(CH<sub>2</sub>NOH···HNO<sub>3</sub>)-I**

C,0,-2.3235775091,-0.425349323,-0.6787462243  
N,0,-2.0438242423,0.6899010531,-0.1616416482  
O,0,-1.2745485773,0.6407471185,0.9888608381



H,0,-2.9220426287,-0.4050676074,-1.5780454874  
H,0,0.2881908265,1.0509272422,0.3194472659  
H,0,-1.9910009902,-1.3777269494,-0.2680001074  
O,0,1.166138587,1.0944538616,-0.1325198853  
N,0,1.5220837708,-0.1885828279,-0.3655120973  
O,0,0.7664441832,-1.0493614186,0.0302079846  
H,0,-1.0475885223,-0.2845211892,1.1823525699  
O,0,2.5509281025,-0.33201996,-0.9378252087

**(CH<sub>2</sub>NOH...HNO<sub>3</sub>)-II**

C,0,-2.3623424859,-0.4875515745,-0.397931501  
N,0,-2.4601952506,0.0696505078,0.7282326096  
O,0,-1.4239615197,0.9894548565,0.9294124975  
H,0,-3.124387455,-1.2171535018,-0.6306621931  
H,0,0.1761555335,0.3347254809,0.7768288382  
H,0,-1.5660375078,-0.2587065382,-1.0996959558  
O,0,1.0837460659,-0.0458694907,0.8600291084  
N,0,1.5514908638,-0.1803098662,-0.4057061909  
O,0,0.7985473088,0.1300704651,-1.2950671962  
H,0,-1.6263251419,1.3782575366,1.784876247  
O,0,2.6613135889,-0.5958878757,-0.4892862636

**HCN...HNO<sub>3</sub>...H<sub>2</sub>O**

C,0,-1.8950164235,-1.2124449708,-0.7629408922  
N,0,-2.1262689326,-0.43349679,0.0378032374  
O,0,-0.7739695141,1.7940587473,1.3778717548  
H,0,-1.6582592987,-1.9358424492,-1.5122489151  
H,0,-0.3415237695,1.4146275011,2.1487286148  
H,0,0.1708687478,1.3934615611,0.1481659264  
O,0,0.9451065,-0.5272805917,0.853749557  
N,0,0.8988813663,-0.2747199247,-0.3234967191  
O,0,0.590276647,0.9837171412,-0.6740164035  
H,0,-1.5050398549,1.1899528231,1.1797623693  
O,0,1.0884695322,-1.0288780475,-1.2344575297

**(CH<sub>2</sub>NOH...H<sub>2</sub>SO<sub>4</sub>)-I**

C -2.70597 0.42397 -0.42503  
N -2.09941 -0.66086 -0.20897  
O -1.56109 -0.83696 1.04154  
H -2.82699 1.19335 0.33444  
H -0.43575 -0.90207 -1.00094  
H -3.10687 0.57322 -1.41739  
O 0.49613 -0.70775 -1.24945  
S 1.16039 0.31766 -0.28636  
O 0.19155 1.23758 0.19578  
H -1.41428 0.0339 1.44315  
O 2.34864 0.74712 -0.92036  
O 1.542 -0.56416 0.96214  
H 2.35615 -1.05109 0.77918

**(CH<sub>2</sub>NOH...H<sub>2</sub>SO<sub>4</sub>)-II**

C,0,-2.9063751923,0.2623166406,-0.4385458711  
N,0,-2.9884515218,-0.9371784068,-0.06065312  
O,0,-1.8736882512,-1.2984304732,0.7138514904  
H,0,-2.0716542196,0.908805391,-0.1817943513  
H,0,-0.4014318336,-1.0333007054,-0.0217416436

H,0,-3.7269968048,0.6182548404,-1.0448534956  
O,0,0.4628617793,-0.8849966518,-0.4863696981  
S,0,1.1216007861,0.4524919735,-0.0531764067  
O,0,0.1153956962,1.4231230893,0.1826470643  
H,0,-2.0626602461,-2.2019971922,0.9816352176  
O,0,2.2027889751,0.6819573886,-0.9360991495  
O,0,1.7071097933,0.1051244595,1.3727068899  
H,0,2.5746600392,-0.3065943536,1.2676620739

**HCN···H<sub>2</sub>SO<sub>4</sub>···H<sub>2</sub>O**

C,0,-2.3732190004,1.0806163655,-0.7720063399  
N,0,-2.9167065708,0.1580479121,-0.3770365038  
O,0,-1.4141145901,-1.8718184432,1.0266669501  
H,0,-0.5605027109,-0.6755011775,1.3495980969  
H,0,-0.9498223992,-2.1954081127,0.244257406  
H,0,-1.8264198697,1.9302688606,-1.1219548178  
O,0,0.5341726141,-0.7208107404,-0.7819403109  
S,0,0.7670466728,0.3873253678,0.0791074384  
O,0,0.0243414397,0.1719731229,1.4046188107  
H,0,-2.2264092168,-1.4747107564,0.6778032436  
O,0,0.5286481214,1.7158712235,-0.378718009  
O,0,2.2776859694,0.2999208082,0.5103837381  
H,0,2.5890725405,1.1724855694,0.7824182977

**(INT)-I**

C,0,-2.4127310985,-0.2939227287,-0.4903528575  
N,0,-1.3699087122,0.1795096995,0.0380057325  
O,0,-0.2404127553,-0.4111857231,-0.4909968808  
H,0,-2.3853737382,-1.0558300202,-1.2638365368  
H,0,-3.3531433664,0.0972590034,-0.1316680108  
H,0,1.2880388133,0.9759931817,-1.661228757  
O,0,1.1714184447,1.3124498968,-0.75786515  
N,0,0.8919251597,0.2210520014,0.0533540087  
C,0,1.9499048801,-0.7681926467,-0.1007437409  
H,0,2.8720961517,-0.3055373628,0.2340382717  
H,0,1.710237234,-1.6233819369,0.5231161496  
H,0,2.0465229873,-1.0871963645,-1.1449642284

**(INT)-II**

C,0,-2.4556881866,-0.2836082968,-0.0667142923  
N,0,-1.3532726295,0.240848967,0.2520505689  
O,0,-0.2961367881,-0.5655534264,-0.0905021748  
H,0,-2.5238398231,-1.2542487676,-0.548400422  
H,0,-3.3452673169,0.2822391241,0.1662187982  
H,0,0.778999627,1.8275811508,-0.4112354928  
O,0,1.182309244,1.0100310937,-0.7183606856  
N,0,0.8889479992,0.0998010595,0.3047725768  
C,0,1.9080791982,-0.9359000754,0.2002171531  
H,0,2.8582133656,-0.4734152483,0.444651776  
H,0,1.6715633793,-1.7104925775,0.9222535525  
H,0,1.940641931,-1.348736003,-0.8095123579

**TS-1**

C,0,-0.1144040202,-0.0436622883,0.2451853079  
H,0,-0.2701260224,0.2230953466,1.28135072  
H,0,0.7761371336,-0.4341561444,-0.8132117309

H,0,-0.3842445129,0.7359413293,-0.4684869579  
O,0,0.0966087653,-1.4950087613,-1.227226171  
N,0,-0.5920223434,-1.2409464818,-0.2042961681

**TS-2** C,0,-0.0367041132,0.9126378209,0.7953922878  
H,0,-0.7046224793,1.2656956696,1.5700135183  
H,0,0.4813380877,-0.0091980423,-1.4636328928  
H,0,0.8312250346,1.5002956822,0.5043399724  
O,0,0.6268439329,-0.586073148,-0.7064794408  
N,0,-0.3132014625,-0.1979019823,0.269541555

**TS-3** C,0,-0.1100307075,0.8550628465,0.8750812926  
H,0,-0.4234041,1.3022200599,1.8145615779  
H,0,0.6061465949,-1.1240010869,-0.8645534648  
H,0,0.6159492404,0.6165260085,-0.3152013851  
O,0,0.118939557,-0.2915212774,-0.9484251143  
N,0,-0.765553505,-0.1157574106,0.4665214736

**TS-4** C,0,0.4174577029,0.144283636,0.1684544837  
N,0,0.5052298229,0.1684030254,1.50963344  
O,0,1.5531113581,-0.3788746643,1.9490093848  
H,0,0.9198039857,-0.652297754,-0.3746738688  
H,0,-0.4816183279,0.5725638731,-0.2493359546  
H,0,1.5053543242,0.9974702748,0.0380378146  
O,0,2.5568609476,1.406182199,0.4475342781  
N,0,3.0514739596,0.5877212744,1.2686833952  
C,0,3.7305097808,-0.5247406197,0.6007760489  
H,0,4.7295681304,-0.1502228324,0.3719508529  
H,0,3.7975110467,-1.3526872338,1.2971632456  
H,0,3.2332352692,-0.8109951786,-0.3241061203

**TS-5** C,0,-2.3026073802,-0.2232604242,0.0915577154  
N,0,-1.3342933601,0.294860992,-0.5292085791  
O,0,-0.1560215987,-0.3755705295,-0.2432965527  
H,0,-2.1856986333,-1.0729305037,0.7575346304  
H,0,-3.2713254978,0.2261754318,-0.0682466039  
H,0,0.2967959775,-1.0129694092,-2.2084890203  
O,0,1.0619070087,-0.4309812449,-2.1458059613  
N,0,0.8946443874,0.2647020547,-0.9135084345  
C,0,2.0753007188,-0.0601019174,-0.1208735776  
H,0,2.9345319929,0.3040482795,-0.6743381045  
H,0,1.9933712525,0.4639419397,0.8265790113  
H,0,2.1619691325,-1.1368976689,0.0349534769

**TS-6** C -1.43003 -0.67353 -0.69452  
N -1.15919 0.04874 0.22795  
O 0.83025 -0.36686 -0.5875  
H -0.42256 -0.99141 -1.27058  
H -2.38697 -1.04537 -1.04975  
H 2.14713 1.5842 -1.3575  
O 2.50586 0.72308 -1.59752  
N 2.07369 -0.1269 -0.56251

C 2.96139 -1.27998 -0.51221  
H 3.97536 -0.93203 -0.35039  
H 2.63116 -1.90153 0.31265  
H 2.89768 -1.83261 -1.45328

**TS-7** C,0,-2.1726098514,-0.0832595747,0.3297154185  
N,0,-2.1403087781,0.9231208113,0.8712385958  
O,0,0.0347320746,-0.7833467064,-1.2873013561  
H,0,0.2647851764,0.5376977511,-1.1324017503  
H,0,-2.1392364041,-1.0054506849,-0.2107027985  
H,0,-0.0591061305,1.2126826244,0.3843394669  
O,0,0.698708358,0.9173542646,-0.1537852156  
N,0,0.5910837774,-0.7016873627,-0.0643556883  
C,0,1.9992016559,-1.0886611381,-0.1214785992  
H,0,2.4908716104,-0.7870173067,0.7982312827  
H,0,1.9856033916,-2.1741678249,-0.198568446  
H,0,2.4821701198,-0.6646698533,-1.0010829098

**TS-8** C,0,-0.0003350063,0.0003130727,-0.0029933692  
H,0,-0.0062096056,0.0009096341,1.088080103  
H,0,1.4387018139,-0.0074132477,0.0834928748  
H,0,3.0761463939,-0.7249151979,-0.1834635019  
H,0,-0.5369088318,0.7851428369,-0.5126024874  
O,0,2.4106541816,-0.6120888617,0.5045593553  
H,0,1.7852093271,-1.4682734351,0.4816764862  
O,0,0.5931706085,-2.1269254401,-0.0294990441  
N,0,-0.0065049263,-1.192087901,-0.626664217

**TS-9** C,0,0.0021948515,0.0000413917,0.0044923757  
H,0,-0.0073524583,-0.0161101862,1.0916960673  
H,0,2.250073124,-0.0071316004,1.660930929  
H,0,2.6899697333,0.9423482724,2.7877022181  
H,0,-0.7745443919,0.5151623818,-0.5459732381  
O,0,1.9397477247,0.449705452,2.4527844378  
H,0,1.4770297025,-1.953797588,0.4928424128  
O,0,1.894747848,-1.1746983759,0.1090394302  
N,0,0.9031074809,-0.5444168588,-0.6886733515

**TS-10** C,0,0.0029557179,0.0044344673,0.0123580107  
H,0,-0.0017567814,0.0029207304,1.4424301653  
H,0,1.5898725656,-0.008086917,1.7739008351  
H,0,0.4185836855,-0.8265838387,2.9283604686  
H,0,-0.751261034,-0.0643563263,-0.7720466673  
O,0,0.5820535899,-0.0031603021,2.460605392  
H,0,2.8668895776,-0.5574159744,0.6081855844  
O,0,2.2488275426,0.1510535057,0.8083572415  
N,0,1.1322048188,-0.0045710092,-0.4775969025

**TS-11** C,0,-0.086832047,-0.000541086,-0.0229276557  
H,0,-0.3445239684,-0.1255993304,1.0306399713  
H,0,1.4121831138,-0.0679383059,0.2622847117  
H,0,3.1601481691,-0.6426460446,-0.0350528776

H,0,-0.4563894103,0.864986655,-0.5526584612  
H,0,2.0235793141,-1.5614927803,0.7716195138  
O,0,0.3888458141,-2.1510187445,-0.140931158  
N,0,0.0857797967,-1.1076732006,-0.7641769538  
N,0,2.4260108807,-0.62186074,0.6629354742  
H,0,2.7669313346,-0.2448780097,1.5374281709

**TS-12**

C,0,-0.1377388911,-0.2130014867,-0.0134229138  
H,0,-0.1152918149,-0.3899652442,1.0591539608  
H,0,2.1253875545,0.2435037745,1.7289960182  
H,0,2.2667601886,0.5699418876,3.3229548527  
H,0,-1.0009233115,0.2425938535,-0.4820493829  
H,0,1.6617145994,-1.9588261405,0.1321095777  
O,0,1.9216969201,-1.0556956314,-0.0772766746  
N,0,0.8264690083,-0.4891377633,-0.7773447192  
N,0,1.6888118022,0.7291819961,2.5068549093  
H,0,1.7431690246,1.7199498942,2.3031941617

**TS-13**

C,0,-1.2839279397,0.2437109646,-0.3844827177  
H,0,-0.5031094775,0.8311415283,1.013264297  
H,0,0.9716399919,0.2095638887,0.8133625469  
H,0,0.3318925686,0.3629419575,2.4951320126  
H,0,-2.2957485007,0.1600181408,-0.7905931802  
H,0,1.405805643,-1.1706864507,-0.7334145704  
O,0,1.0745746478,-0.3041265455,-0.490334347  
N,0,-0.5367966647,-0.4427290408,-1.0782960283  
N,0,0.4381819296,0.8180132454,1.5964843173  
H,0,0.830754802,1.7452103116,1.70965467

**TS-14**

C,0,0.006762351,0.008025673,0.0017993366  
H,0,-0.0083708988,-0.0093422235,1.0806013177  
H,0,0.6105195522,-0.0734213216,-2.1743627089  
H,0,-0.9342870854,0.2571413543,-0.4890094816  
O,0,0.7739999501,-1.0467371907,-1.7861201424  
N,0,0.6977751584,-1.0396514463,-0.5269418059  
H,0,0.611928011,0.940731308,-0.557480213  
Cl,0,0.9472076209,1.7044279639,-2.1511165764

**TS-15**

C,0,-0.0091313072,0.0166151195,0.032912305  
N,0,0.1057933639,-0.18504758,1.2699891484  
O,0,1.452872351,-0.1212774624,1.7043604456  
Cl,0,0.922447382,-0.6085572773,4.8482623262  
H,0,-1.0095402329,-0.0383291815,-0.3754268842  
H,0,1.7054491919,0.8092034716,1.6783528564  
H,0,0.8407655687,0.2302017486,-0.6108035446  
H,0,1.1332218066,-0.5637378456,3.5769976252

**TS-16**

C,0,-0.0048119637,-0.0035224401,0.0095335743  
H,0,-0.0094780537,0.0062056616,1.0982284622  
H,0,1.4202027644,0.0080311505,-2.650081437  
H,0,-0.8237339802,-0.6335451884,-0.6386319481  
O,0,0.6068532406,0.4493328159,-2.382448438

N,0,0.897108397,0.6000592064,-0.5286370853  
H,0,-0.1447659192,-0.2153121417,-2.4807624473  
Cl,0,-1.5769665148,-1.4018607304,-1.9867463778

**TS-17**

C,0,0.4953764028,-0.0002277895,0.0837003668  
N,0,0.3028405544,-0.6535652564,1.2473877094  
O,0,0.9360657181,-0.2219252557,2.2405740536  
H,0,0.7845347945,1.0497785567,0.134607612  
H,0,1.7405139833,-0.5027184637,-0.108175852  
H,0,-0.1729811592,-0.3034610338,-0.7083451576  
O,0,3.0068572265,-0.6650979655,-0.1390329141  
C,0,3.619635086,0.0477089072,0.6761915237  
O,0,3.1269297134,0.6341895257,1.6817585092  
H,0,2.0741891485,0.3523372616,1.932754822  
H,0,4.689909532,0.1985455135,0.5210393271

**TS-18**

C,0,-1.8433516477,0.4151934062,-0.8130862473  
N,0,-2.1178610053,-0.6106908615,-0.1338586289  
O,0,-1.0608982394,-0.9482648385,0.7629798239  
H,0,-0.9193384803,0.9768700154,-0.6934305538  
H,0,0.5673322256,-0.9698201047,0.0620647961  
H,0,-2.5931398879,0.7159015805,-1.5340116665  
O,0,1.4784020925,-0.9351823924,-0.3071157548  
C,0,1.8912972735,0.3179323703,-0.3430610718  
O,0,1.2479333355,1.2736818238,-0.0058305942  
H,0,-1.1376204996,-0.3410790039,1.5077896365  
H,0,2.9141922031,0.3829363247,-0.7298900492

**TS-19**

C,0,-1.5189520483,0.5142717138,-0.8551302993  
N,0,-1.9751556646,-0.1488931788,0.0713106587  
O,0,-0.718285795,-1.1813796582,0.616777369  
H,0,-0.1968485905,0.5949687632,-1.2877007134  
H,0,0.1963835081,-0.6215542595,0.6000245147  
H,0,-2.3166021413,1.1619190155,-1.2308812458  
O,0,1.411895155,0.0320915498,0.5067223787  
C,0,1.7345877056,0.5204789679,-0.5863664754  
O,0,0.9633843109,0.7528913702,-1.5612216664  
H,0,-0.9799684581,-1.3458483546,1.5286109412  
H,0,2.7867780182,0.7861780709,-0.7435594619

**TS-20**

C,0,0.4907623454,-0.0318218895,0.1215349369  
N,0,0.254557367,0.6210662402,1.2882602603  
O,0,1.0221747902,0.3564450933,2.2427448843  
H,0,-0.2507830468,0.175805865,-0.6341947297  
H,0,1.628778814,0.5052559664,-0.0820357828  
H,0,0.8618082242,-1.0546759052,0.1930941964  
O,0,2.9703265287,0.8173748468,0.0234249867  
N,0,3.6294280303,-0.1056679668,0.5990137701  
O,0,3.0420947037,-0.7751181394,1.5124024016  
H,0,1.9264384781,-0.2306244252,1.9281385914  
O,0,4.7542307653,-0.3425616855,0.2988184848

**TS-21** C,0,-2.2999456039,-0.2626521039,-0.7216783615  
N,0,-2.507295807,0.6657841798,0.1045909199  
O,0,-1.3567165212,0.9326393422,0.9049977266  
H,0,-3.1235924677,-0.504660337,-1.3805560455  
H,0,0.0919298072,0.9587837793,0.0929036644  
H,0,-1.3619953805,-0.8095303915,-0.7820728651  
O,0,0.9564404674,0.9588315991,-0.403805971  
N,0,1.4849525353,-0.2700924125,-0.2146580767  
O,0,0.8274520062,-1.0507031136,0.4369088365  
H,0,-1.3165889104,0.2316852223,1.5674967265  
O,0,2.5443724745,-0.4513936643,-0.7194362641

**TS-22** C,0,-1.7627175193,-0.568900917,-0.6153755791  
N,0,-2.2790369576,-0.0541154799,0.359806229  
O,0,-1.0685542563,1.1060585186,0.9900360728  
H,0,-2.4447348103,-1.2862275813,-1.078661114  
H,0,-0.1853857817,0.5969051078,0.9118068551  
H,0,-0.5223159847,-0.3511543197,-1.0467542035  
O,0,1.0703748775,-0.2168156986,0.6971219316  
N,0,1.5011058949,-0.2944287847,-0.4750928965  
O,0,0.6538637724,-0.1579216535,-1.4381820264  
H,0,-1.3115093358,1.1610579825,1.9208610387  
O,0,2.6479647909,-0.4885424141,-0.7285742477

**TS-23** C,0,0.5690690371,0.1320433009,0.0714442864  
N,0,0.339872925,-0.819498678,1.0118970205  
O,0,1.0530859902,-0.793118145,2.0423709214  
H,0,0.9153355525,1.1039433843,0.4228783967  
H,0,1.6993699811,-0.2889194828,-0.312517688  
H,0,-0.1671115974,0.1151014558,-0.717975908  
O,0,3.06727892,-0.5466010781,-0.3809331021  
S,0,3.8896560824,0.1060297725,0.6487026388  
O,0,3.0127505082,0.6194769198,1.7216963228  
H,0,1.8974936051,-0.0906237203,1.9760784285  
O,0,4.8463625354,1.0497416738,0.1948816035  
O,0,4.669902947,-1.1162861541,1.2771795667  
H,0,5.5433392534,-0.8171531288,1.5590724626

**TS-24** C,0,-2.8862765842,0.3025737475,-0.5652639074  
N,0,-3.0685212098,-0.5748296338,0.3204013829  
O,0,-1.8469832209,-0.9356770566,0.9694459437  
H,0,-1.9201601517,0.7531906356,-0.7755716856  
H,0,-0.5029576073,-0.949281258,0.0597169316  
H,0,-3.7673047335,0.6053915581,-1.1163535708  
O,0,0.3456751544,-0.7729385029,-0.4448611883  
S,0,1.0490499825,0.4684750374,0.159723465  
O,0,0.0703514464,1.2951211531,0.7780684077  
H,0,-1.6965700105,-0.2573669938,1.6424842774  
O,0,1.9514034996,0.9648491867,-0.8092839568  
O,0,1.8798615589,-0.1413497712,1.3542596171  
H,0,2.7105714964,-0.5042629821,1.0198625333

**TS-25**

C,0,-2.3409542699,0.6468519142,-0.3514982042  
N,0,-2.8583234058,-0.3842142571,0.0305377851  
O,0,-1.5490658679,-1.6342526679,0.2994530337  
H,0,-1.0846789945,0.9996007415,-0.5237090056  
H,0,-0.7544158853,-1.4358365374,-0.2895610847  
H,0,-3.1302189223,1.386805672,-0.5303191044  
O,0,0.5304882317,-0.9730186125,-1.0711689719  
S,0,1.0923072735,0.2411641325,-0.5221464828  
O,0,0.1204266297,1.3634539998,-0.6494795452  
H,0,-1.2554835579,-1.4873954124,1.2072983669  
O,0,2.4057403695,0.6128625499,-0.8988668614  
O,0,1.0963083682,-0.0806574018,1.0479466826  
H,0,1.6723680312,0.5485628792,1.4992383921

**References:**

1. A. Varandas and F. Pansini, *J. Chem. Phys.*, 2014, 141, 224113.
2. S. Sarkar, S. Mallick, Deepak, P. Kumar and B. Bandyopadhyay, *Phys. Chem. Chem. Phys.*, 2017, 19, 27848.
3. S. Sarkar, S. Mallick, P. Kumar and B. Bandyopadhyay, *Phys. Chem. Chem. Phys.*, 2018, 20, 13437.
4. S. Sarkar, B. K. Oram and B. Bandyopadhyay, *Phys. Chem. Chem. Phys.*, 2019, 21, 16170.
